# Supplementary material
Source: publisher site journal article supplement (https://static.cambridge.org/content/id/urn:cambridge.org:id:article:S1041610218002077/resource/name/S1041610218002077supp001.docx)
Supplement: Supplementary file 1 [file S1041610218002077supp001.docx]

**Appendix A1. Content Validity of the Professional Good Practices Scale in Nursing Homes**

**Instructions:** A list of behaviors related to work with older people in institutions are presented below. Please, indicate the frequency level these behaviors have been carried out in your institution, in general, and by you, in particular, **IN THE LAST MONTH** these. Please, think about the care-recipients in general, regardless of their level of physical and / or cognitive impairment.

*The frequency will be measured as follows:*

**Never: if it has not been carried out in the last month.**

**Once: if it has been carried out one time in the last month.**

**Occasionally: if it has been carried out between 2 and 5 times in the last month.**

**Fairly: if it has been carried out between 6 and 10 times in the last month.**

**A lot: if it has been carried out more than 10 times in the last month.**

| LIST OF BEHAVIORS | How often it has been carried out in your  **INSTITUTION**? | | | | | How often it has been carried out  by **YOU**? | | | | |
| --- | --- | --- | --- | --- | --- | --- | --- | --- | --- | --- |
| Never | Once | Occasio-nally  (2-5 times) | Fairly  (6-10 times) | A lot (more than 10 times) | Never | Once | Occasio-nally  (2-5 times) | Fairly  (6-10 times) | A lot (more than 10 times) |
| 1. Use of materials appropriate to users´ age, avoiding using children's materials. |  |  |  |  |  |  |  |  |  |  |
| 2. Assist users *(older people)* in a personalized way. |  |  |  |  |  |  |  |  |  |  |
| 3. Look after users´ requests as soon as possible. |  |  |  |  |  |  |  |  |  |  |
| *4. Provide care to users in a hurry.* |  |  |  |  |  |  |  |  |  |  |
| 5. Treat the user's cleaning utensils in a non-transferable manner. |  |  |  |  |  |  |  |  |  |  |
| *6. Administer drugs to users without being prescribed.* |  |  |  |  |  |  |  |  |  |  |
| 7. Encourage users to develop an active role in the center. |  |  |  |  |  |  |  |  |  |  |
| 8. Ask for permission to enter each user's room. |  |  |  |  |  |  |  |  |  |  |
| 9. Prevent users from staying a large number of hours in the same position. |  |  |  |  |  |  |  |  |  |  |
| LIST OF BEHAVIORS | How often it has been carried out in your  **INSTITUTION**? | | | | | How often it has been carried out  by **YOU**? | | | | |
|  | Never | Once | Occasio-nally  (2-5 times) | Fairly  (6-10 times) | A lot (more than 10 times) | Never | Once | Occasio-nally  (2-5 times) | Fairly  (6-10 times) | A lot (more than 10 times) |
| *10. Ask users how they want to be called before using diminutives (Johnny, Maggie, etc.)* |  |  |  |  |  |  |  |  |  |  |
| *11. Hide users relevant information.* |  |  |  |  |  |  |  |  |  |  |
| *12. Talk about users in their presence as if they were not present.* |  |  |  |  |  |  |  |  |  |  |
| 13. Assist users according to the extent of help they need. |  |  |  |  |  |  |  |  |  |  |
| 14. Ask users if they want to be addressed familiarly or not. |  |  |  |  |  |  |  |  |  |  |
| *15. Insist the user to sign legal documents, even if he or she does not want to.* |  |  |  |  |  |  |  |  |  |  |
| 16. Speak without yelling at users. |  |  |  |  |  |  |  |  |  |  |
| 17. Ensure that users are dressed in their clothes (not with others´ ones). |  |  |  |  |  |  |  |  |  |  |
| 18. Administer medications, without consulting the doctor, to facilitate professionals´ job. |  |  |  |  |  |  |  |  |  |  |
| 19. Facilitate users access to religious practices. |  |  |  |  |  |  |  |  |  |  |
| *20. Take users by the hand, even if they do not need it.* |  |  |  |  |  |  |  |  |  |  |
| 21. Procure an individualized care plan for each user. |  |  |  |  |  |  |  |  |  |  |
| *22. Leave the intimate hygiene items exposed to anyone.* |  |  |  |  |  |  |  |  |  |  |
| 23. Respect users´ privacy during their personal cleanliness, taking place with the door closed. |  |  |  |  |  |  |  |  |  |  |
| 24. Lay the user down with the attire with which he or she is habitually accustomed to sleep with. |  |  |  |  |  |  |  |  |  |  |
| *25. Punish users if they do not behave as expected.* |  |  |  |  |  |  |  |  |  |  |
| 26. Explain users why things are done. |  |  |  |  |  |  |  |  |  |  |
| LIST OF BEHAVIORS | How often it has been carried out in your  **INSTITUTION**? | | | | | How often it has been carried out  by **YOU**? | | | | |
| Never | Once | Occasio-nally  (2-5 times) | Fairly  (6-10 times) | A lot (more than 10 times) | Never | Once | Occasio-nally  (2-5 times) | Fairly  (6-10 times) | A lot (more than 10 times) |
| 27. Address users with respect. |  |  |  |  |  |  |  |  |  |  |
| 28. Support the development of voluntary activities to which users can freely decide whether to attend or not. |  |  |  |  |  |  |  |  |  |  |
| 29. Allow the user, if he or she has the capacity, to administer his or her economic resources. |  |  |  |  |  |  |  |  |  |  |
| *30. Consider that users are no longer useful.* |  |  |  |  |  |  |  |  |  |  |
| *31. Mix the pills with the food without informing the users.* |  |  |  |  |  |  |  |  |  |  |
| 32. Maintain discretion over users´ personal issues. |  |  |  |  |  |  |  |  |  |  |
| 33. Provide users the key of their closet. |  |  |  |  |  |  |  |  |  |  |
| 34. Allow users time for telling what happens to them. |  |  |  |  |  |  |  |  |  |  |
| *35. Perform actions that physically harm users.* |  |  |  |  |  |  |  |  |  |  |
| 36. Take into account users´ decision making. |  |  |  |  |  |  |  |  |  |  |
| 37. Carry out the personal cleaning mechanically. |  |  |  |  |  |  |  |  |  |  |
| *38. Use physical restraints to facilitate professionals´ work.* |  |  |  |  |  |  |  |  |  |  |
| 39. Move users carefully. |  |  |  |  |  |  |  |  |  |  |
| 40. Take into account special diet needs. |  |  |  |  |  |  |  |  |  |  |
| *41. Use children's materials in the different activities.* |  |  |  |  |  |  |  |  |  |  |
| 42. Manage the situation properly (calmly and respectfully), even if the user treats the professional improperly. |  |  |  |  |  |  |  |  |  |  |
| LIST OF BEHAVIORS | How often it has been carried out in your  **INSTITUTION**? | | | | | How often it has been carried out  by **YOU**? | | | | |
| Never | Once | Occasio-nally  (2-5 times) | Fairly  (6-10 veces) | A lot (more than 10 times) | Never | Once | Occasio-nally  (2-5 times) | Fairly  (6-10 veces) | A lot (more than 10 times) |
| 43. Provide the needed physical care taking into account the characteristics of each user. |  |  |  |  |  |  |  |  |  |  |
| *44. Force users to eat when their life is not in danger.* |  |  |  |  |  |  |  |  |  |  |
| 45. Respect users´ belongings. |  |  |  |  |  |  |  |  |  |  |
| *46. Punish users as if they were children.* |  |  |  |  |  |  |  |  |  |  |
| 47. Allow capable users to sign their documentation. |  |  |  |  |  |  |  |  |  |  |
| 48. Offer the user the choice of napping during the day. |  |  |  |  |  |  |  |  |  |  |
| *49. Although it is not necessary, put all users a bib in the dining room.* |  |  |  |  |  |  |  |  |  |  |
| 50. Inform users explicitly of the changes in their treatment. |  |  |  |  |  |  |  |  |  |  |
| *51. Address users with words like heaven, love,* [*sweetheart*](http://www.spanishdict.com/traductor/sweetheart)*or similar.* |  |  |  |  |  |  |  |  |  |  |
| 52. Organize users´ closet with their permission. |  |  |  |  |  |  |  |  |  |  |
| 53. Be clear with users´ economic aspects. |  |  |  |  |  |  |  |  |  |  |
| *54. Touch users inappropriately (brusque, intimate).* |  |  |  |  |  |  |  |  |  |  |
| 55. Allow to customize the room so that users feel more comfortable. |  |  |  |  |  |  |  |  |  |  |
| 56. Include users in the conversations when they are present. |  |  |  |  |  |  |  |  |  |  |

Note: Items in italics are reverse-coded
